# Supplementary material
Source: Elsevier journal article supplement (https://comptes-rendus.academie-sciences.fr/geoscience/article/10.1016/j.crte.2016.06.001/file/attach/mmc2.pdf)
Supplement: mmc2 [file mmc2.pdf]

Table 2

| <i>Group</i>                       | <b>Group I</b>              |                           |                            |                           |                            |                            |                           |                             |                            |                            | <b>Group II</b>            |                            |                           |                           |                            |                            |                           |                           |                           |                          |                           |                           |                           |                           |                           |                             |                             |                           |
|------------------------------------|-----------------------------|---------------------------|----------------------------|---------------------------|----------------------------|----------------------------|---------------------------|-----------------------------|----------------------------|----------------------------|----------------------------|----------------------------|---------------------------|---------------------------|----------------------------|----------------------------|---------------------------|---------------------------|---------------------------|--------------------------|---------------------------|---------------------------|---------------------------|---------------------------|---------------------------|-----------------------------|-----------------------------|---------------------------|
|                                    | <i>Subgroup</i>             | <b>la</b>                 |                            | <b>lb</b>                 |                            |                            |                           | <b>lc</b>                   |                            | <b>IIa</b>                 |                            |                            |                           |                           | <b>IIb</b>                 |                            |                           |                           |                           |                          |                           |                           |                           |                           |                           |                             |                             |                           |
| <i>Sample</i>                      | <i>10BB</i><br><i>98(*)</i> | <i>10BB</i><br><i>60G</i> | <i>10BB</i><br><i>60Ia</i> | <i>10BB</i><br><i>60A</i> | <i>10BB</i><br><i>60FG</i> | <i>10BB6</i><br><i>0FV</i> | <i>10BB</i><br><i>60H</i> | <i>10BB</i><br><i>58(*)</i> | <i>10BB</i><br><i>37D1</i> | <i>10BB</i><br><i>37D2</i> | <i>10BB</i><br><i>37D3</i> | <i>10BB</i><br><i>37D4</i> | <i>10BB</i><br><i>31B</i> | <i>10BB</i><br><i>31D</i> | <i>10BB</i><br><i>31F1</i> | <i>10BB</i><br><i>31F2</i> | <i>10BB</i><br><i>31G</i> | <i>10BB</i><br><i>31K</i> | <i>10BB</i><br><i>86B</i> | <i>10BB</i><br><i>77</i> | <i>10BB</i><br><i>88B</i> | <i>10BB</i><br><i>42A</i> | <i>10BB</i><br><i>42B</i> | <i>10BB</i><br><i>42C</i> | <i>10BB</i><br><i>42D</i> | <i>10BB</i><br><i>42ES1</i> | <i>10BB</i><br><i>42GS1</i> | <i>10BB</i><br><i>41B</i> |
| <b>SiO<sub>2</sub> (wt%)</b>       | 45,67                       | 47,23                     | 45,55                      | 46,47                     | 45,98                      | 50,67                      | 46,20                     | 47,79                       | 49,05                      | 47,82                      | 47,99                      | 48,92                      | 47,71                     | 46,66                     | 47,16                      | 48,47                      | 46,83                     | 46,02                     | 47,19                     | 45,12                    | 48,48                     | 45,44                     | 47,22                     | 47,37                     | 46,77                     | 45,62                       | 45,44                       | 46,80                     |
| <b>TiO<sub>2</sub></b>             | 0,20                        | 0,29                      | 0,28                       | 0,29                      | 0,24                       | 0,18                       | 0,31                      | 0,68                        | 0,54                       | 0,59                       | 0,64                       | 0,69                       | 0,56                      | 0,46                      | 0,57                       | 0,64                       | 0,61                      | 0,50                      | 0,57                      | 0,30                     | 0,48                      | 0,85                      | 0,39                      | 0,41                      | 0,43                      | 0,47                        | 0,45                        | 0,49                      |
| <b>Al<sub>2</sub>O<sub>3</sub></b> | 17,11                       | 14,80                     | 13,94                      | 15,71                     | 15,69                      | 8,97                       | 15,27                     | 12,33                       | 10,38                      | 12,49                      | 10,50                      | 11,28                      | 13,28                     | 14,12                     | 13,40                      | 11,42                      | 13,95                     | 15,20                     | 10,80                     | 15,33                    | 11,38                     | 12,96                     | 11,20                     | 9,59                      | 11,50                     | 12,13                       | 12,63                       | 13,44                     |
| <b>Cr<sub>2</sub>O<sub>2</sub></b> | 0,13                        | 0,21                      | 0,34                       | 0,15                      | 0,66                       | 0,25                       | 0,58                      | 0,12                        | 0,26                       | 0,18                       | 0,24                       | 0,21                       | 0,18                      | 0,19                      | 0,25                       | 0,32                       | 0,25                      | 0,19                      | 0,27                      | 0,37                     | 0,16                      | 0,20                      | 0,20                      | 0,24                      | 0,31                      | 0,25                        | 0,33                        | 0,21                      |
| <b>FeO</b>                         | 5,88                        | 5,96                      | 5,90                       | 5,27                      | 5,97                       | 4,10                       | 5,83                      | 12,47                       | 8,45                       | 8,09                       | 8,89                       | 7,96                       | 7,62                      | 7,53                      | 6,41                       | 6,10                       | 6,65                      | 6,95                      | 7,62                      | 5,45                     | 9,75                      | 8,91                      | 8,58                      | 9,60                      | 8,64                      | 8,64                        | 8,35                        | 8,69                      |
| <b>MnO</b>                         | 0,15                        | 0,13                      | 0,12                       | 0,11                      | 0,13                       | 0,11                       | 0,12                      | 0,44                        | 0,17                       | 0,19                       | 0,17                       | 0,18                       | 0,19                      | 0,17                      | 0,18                       | 0,16                       | 0,19                      | 0,20                      | 0,20                      | 0,20                     | 0,23                      | 0,20                      | 0,18                      | 0,17                      | 0,16                      | 0,17                        | 0,19                        | 0,18                      |
| <b>MgO</b>                         | 14,45                       | 16,62                     | 18,73                      | 15,89                     | 18,34                      | 18,45                      | 16,07                     | 14,72                       | 20,49                      | 17,84                      | 21,87                      | 19,63                      | 16,81                     | 17,85                     | 18,13                      | 17,49                      | 17,82                     | 17,64                     | 21,03                     | 20,34                    | 16,94                     | 15,46                     | 16,87                     | 20,01                     | 18,04                     | 19,01                       | 18,85                       | 17,27                     |
| <b>CaO</b>                         | 14,78                       | 12,45                     | 12,50                      | 13,77                     | 11,26                      | 14,80                      | 13,32                     | 8,93                        | 8,78                       | 10,65                      | 7,88                       | 9,05                       | 11,24                     | 10,60                     | 11,96                      | 13,85                      | 11,81                     | 11,34                     | 8,93                      | 10,45                    | 10,12                     | 12,37                     | 12,75                     | 10,22                     | 12,24                     | 10,78                       | 10,89                       | 10,44                     |
| <b>Na<sub>2</sub>O</b>             | 0,97                        | 1,36                      | 1,13                       | 1,22                      | 0,76                       | 1,07                       | 1,28                      | 1,18                        | 0,91                       | 1,13                       | 0,97                       | 1,17                       | 1,51                      | 1,31                      | 0,85                       | 0,95                       | 0,88                      | 0,79                      | 0,94                      | 0,63                     | 1,13                      | 1,08                      | 0,88                      | 0,81                      | 1,02                      | 0,93                        | 0,96                        | 1,05                      |
| <b>K<sub>2</sub>O</b>              | 0,01                        | 0,01                      | 0,01                       | 0,01                      | 0,01                       | 0,01                       | 0,01                      | 0,01                        | 0,01                       | 0,01                       | 0,01                       | 0,01                       | 0,02                      | 0,02                      | 0,02                       | 0,01                       | 0,02                      | 0,02                      | 0,02                      | 0,05                     | 0,01                      | 0,01                      | 0,01                      | 0,01                      | 0,01                      | 0,01                        | 0,01                        | 0,02                      |
| <b>P<sub>2</sub>O<sub>5</sub></b>  | 0,01                        | 0,01                      | 0,01                       | 0,01                      | 0,01                       | 0,01                       | 0,01                      | 0,01                        | 0,01                       | 0,02                       | 0,02                       | 0,02                       | 0,02                      | 0,03                      | 0,03                       | 0,02                       | 0,03                      | 0,03                      | 0,02                      | 0,02                     | 0,01                      | 0,01                      | 0,02                      | 0,02                      | 0,02                      | 0,02                        | 0,02                        | 0,03                      |
| <b>LOI</b>                         | 0,13                        | 0,49                      | 1,20                       | 0,67                      | 0,97                       | 1,18                       | 0,94                      | 0,06                        | 0,27                       | 0,28                       | 0,07                       | 0,21                       | 0,19                      | 0,41                      | 0,57                       | 0,22                       | 0,47                      | 0,54                      | 1,83                      | 1,50                     | 0,38                      | 1,73                      | 0,93                      | 0,71                      | 0,20                      | 1,24                        | 1,28                        | 0,62                      |
| <b>Total</b>                       | 99,48                       | 99,55                     | 99,70                      | 99,57                     | 100,0                      | 99,8                       | 99,95                     | 98,74                       | 99,32                      | 99,28                      | 99,25                      | 99,33                      | 99,33                     | 99,35                     | 99,54                      | 99,64                      | 99,51                     | 99,42                     | 99,42                     | 99,77                    | 99,07                     | 99,21                     | 99,24                     | 99,17                     | 99,34                     | 99,29                       | 99,40                       | 99,24                     |
| <b>mg-no.</b>                      | <i>81,00</i>                | <i>83,20</i>              | <i>84,90</i>               | <i>84,29</i>              | <i>85,45</i>               | <i>88,90</i>               | <i>83,07</i>              | <i>67,79</i>                | <i>81,21</i>               | <i>79,71</i>               | <i>81,43</i>               | <i>81,47</i>               | <i>79,72</i>              | <i>80,85</i>              | <i>83,44</i>               | <i>83,63</i>               | <i>82,68</i>              | <i>81,90</i>              | <i>83,10</i>              | <i>86,92</i>             | <i>75,59</i>              | <i>75,57</i>              | <i>77,81</i>              | <i>78,80</i>              | <i>78,81</i>              | <i>79,67</i>                | <i>85,80</i>                | <i>77,98</i>              |
| <b>Rb (ppm)</b>                    | 0,68                        | 1,11                      | 0,69                       | 0,032                     | 0,42                       | 0,72                       | 0,92                      | 0,28                        | 0,25                       | 0,44                       | 0,35                       | 0,73                       | 1,61                      | 1,40                      | 1,07                       | 0,70                       | 1,24                      | 0,70                      | 0,30                      | 3,17                     | 0,57                      | 0,47                      | 0,65                      | 0,25                      | 0,32                      | 0,47                        | 0,69                        | 0,64                      |
| <b>Sr</b>                          | 55                          | 138                       | 109                        | 11,1                      | 133                        | 70                         | 80                        | 4,65                        | 25,3                       | 36,4                       | 36,9                       | 44,3                       | 47,3                      | 44,3                      | 55                         | 64                         | 50                        | 49                        | 169                       | 58                       | 17,2                      | 57                        | 79                        | 59                        | 95                        | 143                         | 62                          | 48,8                      |
| <b>Zr</b>                          | 3,19                        | 7,24                      | 5,53                       | 1,35                      | 8,87                       | 8,61                       | 10,0                      | 5,72                        | 23,8                       | 27,4                       | 40,7                       | 42,5                       | 19,6                      | 15,7                      | 21,1                       | 21,7                       | 26,0                      | 18,5                      | 24,8                      | 20,0                     | 15,8                      | 20,6                      | 10,9                      | 9,02                      | 12,8                      | 14,9                        | 11,5                        | 22,0                      |
| <b>Nb</b>                          | 1,25                        | 0,075                     | 0,034                      | 0,021                     | 0,069                      | 0,063                      | 0,092                     | 0,391                       | 0,078                      | 0,093                      | 0,123                      | 0,138                      | 0,084                     | 0,156                     | 0,306                      | 0,281                      | 0,319                     | 0,380                     | 0,221                     | 0,286                    | 0,101                     | 0,162                     | 0,113                     | 0,059                     | 0,113                     | 0,109                       | 0,302                       | 0,130                     |
| <b>Ba</b>                          | 1,18                        | 10,66                     | 12,75                      | 1,44                      | 13,96                      | 14,15                      | 6,86                      | 0,69                        | 8,64                       | 4,90                       | 2,89                       | 3,70                       | 2,35                      | 10,69                     | 7,98                       | 9,26                       | 13,32                     | 26,7                      | 10,13                     | 35,9                     | 7,86                      | 7,29                      | 5,44                      | 2,08                      | 2,64                      | 8,41                        | 2,92                        | 4,39                      |
| <b>La</b>                          | 0,50                        | 0,318                     | 0,284                      | 0,0170                    | 0,403                      | 1,03                       | 0,345                     | 0,0187                      | 0,431                      | 0,82                       | 0,67                       | 0,81                       | 0,459                     | 0,370                     | 0,446                      | 0,52                       | 0,436                     | 0,51                      | 0,252                     | 0,52                     | 0,474                     | 0,291                     | 0,62                      | 0,63                      | 0,84                      | 0,79                        | 0,427                       | 0,419                     |
| <b>Ce</b>                          | 0,92                        | 1,10                      | 0,96                       | 0,111                     | 1,41                       | 3,39                       | 1,21                      | 0,054                       | 1,85                       | 3,36                       | 3,08                       | 3,66                       | 1,90                      | 1,56                      | 1,85                       | 2,10                       | 1,68                      | 1,81                      | 1,01                      | 1,84                     | 1,69                      | 1,38                      | 2,33                      | 2,70                      | 3,82                      | 3,51                        | 1,63                        | 2,14                      |
| <b>Pr</b>                          | 0,102                       | 0,206                     | 0,173                      | 0,0255                    | 0,242                      | 0,55                       | 0,222                     | 0,0153                      | 0,364                      | 0,62                       | 0,61                       | 0,70                       | 0,381                     | 0,330                     | 0,389                      | 0,437                      | 0,338                     | 0,349                     | 0,227                     | 0,327                    | 0,324                     | 0,330                     | 0,421                     | 0,492                     | 0,72                      | 0,65                        | 0,298                       | 0,416                     |
| <b>Nd</b>                          | 0,50                        | 1,34                      | 1,10                       | 0,178                     | 1,43                       | 2,92                       | 1,41                      | 0,169                       | 2,34                       | 3,62                       | 3,79                       | 4,22                       | 2,60                      | 2,41                      | 2,59                       | 3,01                       | 2,34                      | 2,27                      | 1,77                      | 2,00                     | 2,20                      | 2,61                      | 2,40                      | 2,85                      | 4,17                      | 3,75                        | 1,85                        | 2,54                      |
| <b>Sm</b>                          | 0,207                       | 0,55                      | 0,469                      | 0,089                     | 0,50                       | 0,74                       | 0,62                      | 0,232                       | 0,94                       | 1,20                       | 1,35                       | 1,45                       | 1,14                      | 1,04                      | 1,15                       | 1,36                       | 1,22                      | 1,02                      | 0,94                      | 0,74                     | 1,04                      | 1,38                      | 0,74                      | 0,84                      | 1,16                      | 1,16                        | 0,70                        | 0,91                      |
| <b>Eu</b>                          | 0,151                       | 0,339                     | 0,280                      | 0,056                     | 0,288                      | 0,243                      | 0,330                     | 0,135                       | 0,395                      | 0,487                      | 0,55                       | 0,59                       | 0,52                      | 0,479                     | 0,52                       | 0,62                       | 0,60                      | 0,50                      | 0,423                     | 0,345                    | 0,450                     | 0,64                      | 0,335                     | 0,345                     | 0,48                      | 0,52                        | 0,336                       | 0,38                      |
| <b>Gd</b>                          | 0,385                       | 0,90                      | 0,79                       | 0,164                     | 0,79                       | 0,69                       | 1,07                      | 1,24                        | 1,62                       | 1,93                       | 2,00                       | 2,18                       | 2,05                      | 1,56                      | 2,02                       | 2,33                       | 2,56                      | 1,98                      | 1,81                      | 1,13                     | 2,05                      | 2,51                      | 1,01                      | 1,05                      | 1,31                      | 1,56                        | 1,08                        | 1,40                      |
| <b>Tb</b>                          | 0,073                       | 0,162                     | 0,143                      | 0,031                     | 0,143                      | 0,106                      | 0,205                     | 0,367                       | 0,300                      | 0,359                      | 0,340                      | 0,381                      | 0,385                     | 0,266                     | 0,369                      | 0,406                      | 0,495                     | 0,393                     | 0,361                     | 0,199                    | 0,418                     | 0,466                     | 0,176                     | 0,174                     | 0,199                     | 0,257                       | 0,194                       | 0,252                     |
| <b>Dy</b>                          | 0,54                        | 1,13                      | 1,01                       | 0,234                     | 1,01                       | 0,72                       | 1,50                      | 3,61                        | 2,21                       | 2,61                       | 2,33                       | 2,64                       | 2,86                      | 1,78                      | 2,65                       | 2,64                       | 3,65                      | 3,02                      | 2,78                      | 1,38                     | 3,25                      | 3,30                      | 1,25                      | 1,16                      | 1,23                      | 1,66                        | 1,38                        | 1,79                      |
| <b>Ho</b>                          | 0,111                       | 0,238                     | 0,215                      | 0,053                     | 0,213                      | 0,151                      | 0,324                     | 0,93                        | 0,482                      | 0,59                       | 0,488                      | 0,57                       | 0,64                      | 0,365                     | 0,56                       | 0,52                       | 0,80                      | 0,68                      | 0,64                      | 0,295                    | 0,74                      | 0,69                      | 0,269                     | 0,235                     | 0,230                     | 0,319                       | 0,289                       | 0,391                     |
| <b>Er</b>                          | 0,323                       | 0,66                      | 0,59                       | 0,155                     | 0,61                       | 0,434                      | 0,96                      | 3,22                        | 1,38                       | 1,70                       | 1,37                       | 1,63                       | 1,87                      | 1,01                      | 1,57                       | 1,30                       | 2,29                      | 1,96                      | 1,99                      | 0,85                     | 2,29                      | 1,99                      | 0,79                      | 0,67                      | 0,62                      | 0,85                        | 0,83                        | 1,16                      |
| <b>Tm</b>                          | 0,046                       | 0,092                     | 0,080                      | 0,022                     | 0,084                      | 0,061                      | 0,140                     | 0,53                        | 0,202                      | 0,252                      | 0,196                      | 0,238                      | 0,277                     | 0,138                     | 0,224                      | 0,169                      | 0,332                     | 0,288                     | 0,303                     | 0,124                    | 0,344                     | 0,280                     | 0,114                     | 0,095                     | 0,080                     | 0,111                       | 0,118                       | 0,171                     |
| <b>Yb</b>                          | 0,29                        | 0,57                      | 0,50                       | 0,16                      | 0,52                       | 0,39                       | 0,91                      | 3,55                        | 1,30                       | 1,60                       | 1,25                       | 1,53                       | 1,78                      | 0,86                      | 1,42                       | 0,99                       | 2,10                      | 1,85                      | 2,00                      | 0,81                     | 2,23                      | 1,76                      | 0,76                      | 0,60                      | 0,50                      | 0,68                        | 0,76                        | 1,11                      |
| <b>Lu</b>                          | 0,047                       | 0,092                     | 0,079                      | 0,028                     | 0,085                      | 0,063                      | 0,150                     | 0,61                        | 0,215                      | 0,265                      | 0,206                      | 0,254                      | 0,298                     | 0,137                     | 0,229                      | 0,149                      | 0,347                     | 0,308                     | 0,342                     | 0,137                    | 0,375                     | 0,281                     | 0,128                     | 0,098                     | 0,079                     | 0,105                       | 0,125                       | 0,187                     |
| <b>Hf</b>                          | 0,117                       | 0,236                     | 0,190                      | 0,041                     | 0,244                      | 0,326                      | 0,289                     | 0,443                       | 0,59                       | 0,58                       | 0,86                       | 0,93                       | 0,55                      | 0,386                     | 0,455                      | 0,51                       | 0,55                      | 0,377                     | 0,57                      | 0,328                    | 0,51                      | 0,58                      | 0,316                     | 0,255                     | 0,301                     | 0,358                       | 0,319                       | 0,483                     |
| <b>Ta</b>                          | 0,100                       | 0,015                     | 0,012                      | 0,0019                    | 0,014                      | 0,007                      | 0,018                     | 0,030                       | 0,020                      | 0,031                      | 0,017                      | 0,022                      | 0,018                     | 0,024                     | 0,042                      | 0,038                      | 0,052                     | 0,052                     | 0,026                     | 0,031                    | 0,014                     | 0,030                     | 0,021                     | 0,011                     | 0,022                     | 0,022                       | 0,035                       | 0,039                     |
| <b>Pb</b>                          | 0,149                       | 0,47                      | 0,59                       | 0,147                     | 1,11                       | 2,33                       | 0,47                      | 0,174                       | 0,244                      | 0,44                       | 0,131                      | 0,162                      | 0,70                      | 0,40                      | 0,123                      | 0,213                      | 0,151                     | 0,354                     | 2,13                      | 0,312                    | 0,62                      | 0,298                     | 0,62                      | 0,56                      | 0,33                      | 0,208                       | 0,41                        | 0,154                     |
| <b>Th</b>                          | 0,052                       | 0,033                     | 0,015                      | 0,0041                    | 0,057                      | 0,139                      | 0,018                     | 0,0035                      | 0,020                      | 0,026                      | 0,0064                     | 0,0077                     | 0,0073                    | 0,0083                    | 0,016                      | 0,017                      | 0,023                     | 0,025                     | 0,012                     | 0,052                    | 0,068                     | 0,023                     | 0,089                     | 0,038                     | 0,024                     | 0,014                       | 0,023                       | 0,016                     |
| <b>U</b>                           | 0,016                       | 0,006                     | 0,0022                     | 0,0015                    | 0,016                      | 0,032                      | 0,0070                    | 0,056                       | 0,0033                     | 0,0019                     | 0,0007                     | 0,0008                     | 0,0011                    | 0,0014                    | 0,0033                     | 0,0041                     | 0,0041                    | 0,0046                    | 0,043                     | 0,024                    | 0,031                     | 0,0072                    | 0,031                     | 0,025                     | 0,013                     | 0,0098                      | 0,046                       | 0,0147                    |

Table 2: Continued

| <i>Group</i>                       | <b>Group II</b> |            |             |              |              |             |             |             |                 | <b>Group III</b> |              |              |          |             |          | <b>Group IV</b> |          |          |              |                 |                |                |                |                                          |                           |       |  |
|------------------------------------|-----------------|------------|-------------|--------------|--------------|-------------|-------------|-------------|-----------------|------------------|--------------|--------------|----------|-------------|----------|-----------------|----------|----------|--------------|-----------------|----------------|----------------|----------------|------------------------------------------|---------------------------|-------|--|
| <i>Subgroup</i>                    | <b>IIc</b>      |            |             |              |              |             |             |             |                 |                  |              |              |          |             |          |                 |          |          |              |                 |                | <b>UBN</b>     | <b>BIR (*)</b> | <b>UB-N<br/>(Godard et al.<br/>2008)</b> | <b>BIR-1<br/>(GeoReM)</b> |       |  |
| <i>Sample</i>                      | 10BB<br>38A     | 10BB<br>72 | 10BB<br>311 | 10BB<br>37B2 | 10BB<br>37D5 | 10BB<br>37F | 10BB<br>51A | 10BB<br>51B | 10BB<br>15A1(*) | 10BB<br>15B(*)   | 10BB<br>37E2 | 10BB<br>37E1 | 10BB 73B | 10BB46<br>B | 10BB 45B | 10BB<br>60C     | 10BB 60D | 10BB 60E | 10BB<br>60FN | 10BB<br>15A2(*) | 10BB<br>15C(*) | 10BB<br>15D(*) |                |                                          |                           |       |  |
| <b>SiO<sub>2</sub> (wt%)</b>       | 47,52           | 45,68      | 45,43       | 47,26        | 48,38        | 46,24       | 47,85       | 47,56       | 51,14           | 46,60            | 46,35        | 45,80        | 47,40    | 45,57       | 46,10    | 52,32           | 54,41    | 53,96    | 48,40        | 52,94           | 51,23          | 52,94          | -              | -                                        | -                         | -     |  |
| <b>TiO<sub>2</sub></b>             | 0,45            | 0,26       | 0,36        | 0,44         | 0,60         | 0,47        | 0,37        | 0,34        | 0,23            | 0,20             | 0,47         | 0,43         | 0,22     | 0,24        | 0,24     | 0,14            | 0,12     | 0,11     | 0,14         | 0,19            | 0,24           | 0,20           | -              | -                                        | -                         | -     |  |
| <b>Al<sub>2</sub>O<sub>3</sub></b> | 8,16            | 9,87       | 13,61       | 8,20         | 8,97         | 8,28        | 10,42       | 12,87       | 6,30            | 3,24             | 7,03         | 6,57         | 4,64     | 5,11        | 6,26     | 6,72            | 5,35     | 5,30     | 7,22         | 5,15            | 4,55           | 4,97           | -              | -                                        | -                         | -     |  |
| <b>Cr<sub>2</sub>O<sub>2</sub></b> | 0,63            | 0,56       | 0,32        | 0,27         | 0,24         | 0,26        | 0,61        | 0,36        | 0,33            | 0,26             | 0,32         | 0,30         | 0,84     | 0,64        | 0,80     | 0,61            | 0,64     | 0,65     | 0,53         | 0,27            | 0,34           | 0,26           | -              | -                                        | -                         | -     |  |
| <b>FeO</b>                         | 6,77            | 5,62       | 7,08        | 9,98         | 9,47         | 8,82        | 6,74        | 6,50        | 5,88            | 9,74             | 8,87         | 9,27         | 7,06     | 7,15        | 6,24     | 4,88            | 5,61     | 5,64     | 6,56         | 8,28            | 8,18           | 8,02           | -              | -                                        | -                         | -     |  |
| <b>MnO</b>                         | 0,15            | 0,17       | 0,16        | 0,17         | 0,17         | 0,16        | 0,21        | 0,21        | 0,15            | 0,13             | 0,15         | 0,15         | 0,15     | 0,14        | 0,15     | 0,10            | 0,11     | 0,11     | 0,11         | 0,16            | 0,14           | 0,15           | -              | -                                        | -                         | -     |  |
| <b>MgO</b>                         | 27,43           | 24,31      | 22,83       | 26,49        | 23,44        | 27,51       | 23,45       | 22,25       | 21,14           | 32,03            | 29,07        | 30,37        | 31,85    | 32,76       | 31,81    | 25,37           | 31,50    | 31,48    | 31,17        | 27,63           | 28,66          | 28,89          | -              | -                                        | -                         | -     |  |
| <b>CaO</b>                         | 7,30            | 9,25       | 8,01        | 5,58         | 6,97         | 6,50        | 8,33        | 8,34        | 12,72           | 3,59             | 5,72         | 5,22         | 4,45     | 5,13        | 6,27     | 8,88            | 1,84     | 1,90     | 3,84         | 3,71            | 4,64           | 2,72           | -              | -                                        | -                         | -     |  |
| <b>Na<sub>2</sub>O</b>             | 0,70            | 0,56       | 0,67        | 0,68         | 0,89         | 0,72        | 0,41        | 0,46        | 0,51            | 0,17             | 0,69         | 0,64         | 0,35     | 0,42        | 0,28     | 0,58            | 0,13     | 0,14     | 0,15         | 0,18            | 0,23           | 0,17           | -              | -                                        | -                         | -     |  |
| <b>K<sub>2</sub>O</b>              | 0,01            | 0,02       | 0,01        | 0,01         | 0,01         | 0,01        | 0,02        | 0,02        | 0,04            | 0,01             | 0,01         | 0,01         | 0,01     | 0,01        | 0,02     | 0,01            | 0,01     | 0,01     | 0,01         | 0,02            | 0,01           | 0,01           | -              | -                                        | -                         | -     |  |
| <b>P<sub>2</sub>O<sub>5</sub></b>  | 0,01            | 0,01       | 0,02        | 0,01         | 0,01         | 0,02        | 0,01        | 0,01        | b.d.l.          | 0,01             | 0,02         | 0,02         | 0,01     | 0,01        | 0,01     | b.d.l.          | b.d.l.   | b.d.l.   | 0,01         | b.d.l.          | 0,01           | b.d.l.         | -              | -                                        | -                         | -     |  |
| <b>LOI</b>                         | 0,73            | 3,68       | 1,02        | 0,07         | 0,04         | 0,30        | 1,46        | 0,73        | 1,20            | 3,12             | 0,65         | 0,49         | 3,08     | 2,67        | 1,88     | 0,47            | 0,31     | 0,74     | 1,69         | 0,80            | 1,18           | 1,04           | -              | -                                        | -                         | -     |  |
| <b>Total</b>                       | 99,87           | 99,98      | 99,52       | 99,16        | 99,19        | 99,28       | 99,88       | 99,65       | 99,63           | 99,12            | 99,34        | 99,27        | 100,1    | 99,85       | 100,1    | 100,1           | 100      | 100      | 99,82        | 99,32           | 99,40          | 99,37          | -              | -                                        | -                         | -     |  |
| <b>mg-no.</b>                      | 87,83           | 88,52      | 85,18       | 82,54        | 81,51        | 84,76       | 86,10       | 85,92       | 86,51           | 85,43            | 85,39        | 85,38        | 88,94    | 89,08       | 90,09    | 90,26           | 90,92    | 90,87    | 89,44        | 85,61           | 86,20          | 86,53          | -              | -                                        | -                         | -     |  |
|                                    |                 |            |             |              |              |             |             |             |                 |                  |              |              |          |             |          |                 |          |          |              |                 |                |                |                |                                          |                           |       |  |
| <b>Rb (ppm)</b>                    | 0,36            | 1,34       | 0,83        | 0,32         | 0,25         | 0,34        | 1,20        | 1,65        | 1,41            | 0,28             | 0,21         | 0,29         | 0,53     | 0,36        | 0,86     | 0,37            | 0,29     | 0,45     | 0,41         | 0,69            | 0,60           | 0,62           | 3,15           | 0,20                                     | 3,49                      | 0,2   |  |
| <b>Sr</b>                          | 25,7            | 33,8       | 32,5        | 19,8         | 32,8         | 31,5        | 20,8        | 45,0        | 54              | 3,71             | 29,3         | 27,1         | 20,9     | 20,7        | 18,6     | 21,8            | 2,42     | 3,51     | 11,3         | 7,10            | 5,60           | 4,25           | 7,20           | 105                                      | 8,48                      | 109   |  |
| <b>Zr</b>                          | 19,2            | 9,48       | 15,6        | 21,8         | 31,9         | 21,2        | 22,4        | 23,6        | 3,69            | 3,32             | 25,9         | 22,5         | 5,74     | 7,76        | 8,34     | 4,45            | 1,58     | 1,76     | 2,41         | 2,09            | 3,92           | 2,39           | 3,33           | 15,7                                     | 4,06                      | 14    |  |
| <b>Nb</b>                          | 0,151           | 0,268      | 0,444       | 0,081        | 0,088        | 0,087       | 0,141       | 0,164       | 0,047           | 0,0153           | 0,108        | 0,080        | 0,105    | 0,108       | 0,302    | 0,024           | 0,0146   | 0,0168   | 0,037        | 0,0215          | 0,034          | 0,024          | 0,059          | 0,51                                     | 0,068                     | 0,55  |  |
| <b>Ba</b>                          | 3,13            | 7,59       | 7,42        | 3,32         | 2,57         | 7,07        | 28,4        | 43,8        | 13,3            | 4,33             | 2,96         | 1,96         | 3,08     | 1,98        | 2,88     | 16,0            | 12,5     | 4,53     | 9,92         | 5,33            | 4,94           | 4,10           | 26,0           | 6,02                                     | 26,37                     | 7,14  |  |
| <b>La</b>                          | 0,53            | 0,64       | 0,343       | 0,477        | 0,58         | 0,56        | 0,473       | 0,372       | 0,137           | 0,124            | 0,61         | 0,87         | 0,233    | 0,303       | 0,467    | 0,54            | 0,051    | 0,076    | 0,212        | 0,049           | 0,163          | 0,116          | 0,313          | 0,60                                     | 0,321                     | 0,62  |  |
| <b>Ce</b>                          | 1,84            | 2,54       | 1,26        | 1,81         | 2,75         | 2,12        | 1,85        | 1,39        | 0,66            | 0,29             | 2,51         | 2,81         | 0,86     | 1,08        | 1,39     | 1,84            | 0,192    | 0,233    | 0,65         | 0,199           | 0,499          | 0,332          | 0,80           | 1,89                                     | 0,81                      | 1,92  |  |
| <b>Pr</b>                          | 0,333           | 0,453      | 0,241       | 0,318        | 0,535        | 0,376       | 0,305       | 0,247       | 0,150           | 0,075            | 0,458        | 0,474        | 0,158    | 0,190       | 0,222    | 0,306           | 0,034    | 0,040    | 0,097        | 0,039           | 0,103          | 0,063          | 0,113          | 0,392                                    | 0,119                     | 0,370 |  |
| <b>Nd</b>                          | 2,08            | 2,56       | 1,54        | 1,85         | 3,31         | 2,29        | 1,86        | 1,54        | 1,04            | 0,456            | 2,69         | 2,63         | 0,94     | 1,15        | 1,24     | 1,58            | 0,172    | 0,192    | 0,481        | 0,291           | 0,64           | 0,374          | 0,61           | 2,36                                     | 0,629                     | 2,38  |  |
| <b>Sm</b>                          | 0,85            | 0,70       | 0,62        | 0,69         | 1,12         | 0,82        | 0,77        | 0,69        | 0,454           | 0,202            | 0,90         | 0,79         | 0,291    | 0,440       | 0,410    | 0,390           | 0,054    | 0,058    | 0,134        | 0,124           | 0,255          | 0,136          | 0,206          | 1,16                                     | 0,223                     | 1,12  |  |
| <b>Eu</b>                          | 0,356           | 0,248      | 0,312       | 0,300        | 0,451        | 0,338       | 0,337       | 0,329       | 0,166           | 0,081            | 0,365        | 0,323        | 0,113    | 0,189       | 0,166    | 0,118           | 0,019    | 0,021    | 0,063        | 0,053           | 0,102          | 0,054          | 0,081          | 0,62                                     | 0,084                     | 0,53  |  |
| <b>Gd</b>                          | 1,41            | 0,79       | 1,00        | 1,25         | 1,65         | 1,25        | 1,52        | 1,45        | 0,58            | 0,284            | 1,29         | 1,18         | 0,363    | 0,72        | 0,64     | 0,326           | 0,058    | 0,062    | 0,172        | 0,178           | 0,326          | 0,176          | 0,330          | 2,00                                     | 0,338                     | 1,87  |  |
| <b>Tb</b>                          | 0,260           | 0,127      | 0,167       | 0,240        | 0,277        | 0,215       | 0,302       | 0,304       | 0,112           | 0,058            | 0,212        | 0,200        | 0,059    | 0,136       | 0,119    | 0,047           | 0,010    | 0,010    | 0,031        | 0,031           | 0,061          | 0,036          | 0,060          | 0,432                                    | 0,063                     | 0,360 |  |
| <b>Dy</b>                          | 1,83            | 0,84       | 1,06        | 1,76         | 1,85         | 1,49        | 2,34        | 2,40        | 0,79            | 0,398            | 1,46         | 1,38         | 0,392    | 0,99        | 0,86     | 0,300           | 0,075    | 0,078    | 0,226        | 0,234           | 0,431          | 0,247          | 0,447          | 3,15                                     | 0,46                      | 2,51  |  |
| <b>Ho</b>                          | 0,388           | 0,172      | 0,207       | 0,393        | 0,388        | 0,311       | 0,54        | 0,57        | 0,146           | 0,064            | 0,303        | 0,287        | 0,081    | 0,218       | 0,190    | 0,063           | 0,017    | 0,018    | 0,050        | 0,039           | 0,078          | 0,047          | 0,098          | 0,60                                     | 0,103                     | 0,56  |  |
| <b>Er</b>                          | 1,14            | 0,494      | 0,54        | 1,14         | 1,08         | 0,87        | 1,62        | 1,77        | 0,423           | 0,176            | 0,84         | 0,82         | 0,233    | 0,65        | 0,55     | 0,176           | 0,056    | 0,053    | 0,146        | 0,108           | 0,20           | 0,143          | 0,294          | 1,75                                     | 0,306                     | 1,66  |  |
| <b>Tm</b>                          | 0,164           | 0,069      | 0,075       | 0,168        | 0,154        | 0,124       | 0,246       | 0,272       | 0,059           | 0,0236           | 0,117        | 0,118        | 0,032    | 0,094       | 0,079    | 0,024           | 0,009    | 0,008    | 0,021        | 0,0179          | 0,0264         | 0,0204         | 0,043          | 0,247                                    | 0,046                     | 0,250 |  |
| <b>Yb</b>                          | 1,08            | 0,449      | 0,464       | 1,09         | 0,96         | 0,79        | 1,62        | 1,81        | 0,380           | 0,157            | 0,75         | 0,76         | 0,217    | 0,61        | 0,51     | 0,157           | 0,068    | 0,066    | 0,149        | 0,104           | 0,176          | 0,143          | 0,293          | 1,71                                     | 0,305                     | 1,65  |  |
| <b>Lu</b>                          | 0,179           | 0,073      | 0,076       | 0,183        | 0,160        | 0,130       | 0,271       | 0,310       | 0,062           | 0,026            | 0,123        | 0,126        | 0,037    | 0,102       | 0,086    | 0,025           | 0,012    | 0,012    | 0,025        | 0,0177          | 0,029          | 0,0223         | 0,050          | 0,272                                    | 0,052                     | 0,250 |  |
| <b>Hf</b>                          | 0,482           | 0,227      | 0,307       | 0,53         | 0,78         | 0,463       | 0,464       | 0,429       | 0,219           | 0,158            | 0,53         | 0,52         | 0,178    | 0,204       | 0,211    | 0,182           | 0,063    | 0,067    | 0,082        | 0,115           | 0,202          | 0,130          | 0,097          | 0,64                                     | 0,139                     | 0,58  |  |
| <b>Ta</b>                          | 0,023           | 0,023      | 0,032       | 0,017        | 0,040        | 0,027       | 0,021       | 0,029       | 0,015           | 0,0009           | 0,015        | 0,021        | 0,015    | 0,010       | 0,032    | 0,0052          | 0,0025   | 0,0021   | 0,0059       | 0,0102          | 0,0072         | 0,0020         | 0,027          | 0,044                                    | 0,019                     | 0,036 |  |
| <b>Pb</b>                          | 0,312           | 0,76       | 0,355       | 0,384        | 0,142        | 1,11        | 0,60        | 0,362       | 0,445           | 1,20             | 0,059        | 0,170        | 0,271    | 0,343       | 0,496    | 2,18            | 0,75     | 0,85     | 1,53         | 1,00            | 0,63           | 1,31           | 12,3           | 2,70                                     | 13,4                      | 3,10  |  |
| <b>Th</b>                          | 0,033           | 0,055      | 0,017       | 0,021        | 0,004        | 0,025       | 0,018       | 0,011       | 0,016           | 0,0248           | 0,010        | 0,009        | 0,018    | 0,012       | 0,035    | 0,072           | 0,021    | 0,028    | 0,0615       | 0,0111          | 0,045          | 0,029          | 0,107          | 0,033                                    | 0,074                     | 0,032 |  |
| <b>U</b>                           | 0,014           | 0,037      | 0,0035      | 0,0023       | 0,0019       | 0,0045      | 0,026       | 0,010       | 0,0053          | 0,062            | 0,0017       | 0,0011       | 0,088    | 0,078       | 0,343    | 0,0144          | 0,0028   | 0,0051   | 0,018        | 0,0047          | 0,0167         | 0,0124         | 0,048          | 0,009                                    | 0,058                     | 0,01  |  |
